# Supplementary material for: A flavonoid-rich Smilax china L. extract prevents obesity by upregulating the adiponectin-receptor/AMPK signalling pathway and modulating the gut microbiota in mice
Source: Royal Society of Chemistry journal article supplement (doi:10.1039/d1fo00282a), 2021-01-01
Supplement: d1fo00282a1.pdf [file d1fo00282a1.pdf]

**A flavonoid-rich *Smilax china* L. extract prevents obesity by upregulating the  
adiponectin-receptor/AMPK signalling pathway and modulating the gut  
microbiota in mice**

**Xin Li, Licong Yang, Jingen Li, Lezhen Lin, Guodong Zheng\***

Jiangxi Key Laboratory of Natural Product and Functional Food, College of Food  
Science and Engineering, Jiangxi Agricultural University, Nanchang 330045, China.

\*Corresponding to: Dr. Guodong ZHENG, Jiangxi Key Laboratory of Natural Product  
and Functional Food, College of Food Science and Engineering, Jiangxi Agricultural  
University, Nanchang 330045, China. Tel & Fax: 86-791-83813863, E-mail:  
zrs150716@aliyun.com

**Table S1. Reagents and materials**

| The name of reagent                                                                  | manufacturers                                 |
|--------------------------------------------------------------------------------------|-----------------------------------------------|
| Haematoxylin and eosin (H&E)                                                         | Wuhan Seville Biological Technology Co., Ltd. |
| Oil Red O                                                                            | Wuhan Seville Biological Technology Co., Ltd. |
| total cholesterol (TC)                                                               | Nanjing Jiancheng Bioengineering Institute    |
| triglycerides (TG)                                                                   | Nanjing Jiancheng Bioengineering Institute    |
| lipopolysaccharide (LPS)                                                             | Nanjing Jiancheng Bioengineering Institute    |
| adiponectin                                                                          | Cloud-Clone Corp                              |
| Sodium dodecyl sulfate-polyacrylamide gel electrophoresis (SDS-PAGE) (PVDF) membrane | Boster biological technology<br>Millipore     |
| Bicinchoninic acid (BCA)                                                             | Beijing Pulai gene Technology Co. LTD         |
| Bovine serum albumin (BSA)                                                           | Beijing Pulai gene Technology Co. LTD         |
| ACC #BM4414                                                                          | Boster biological technology                  |
| CPT-1 $\alpha$ #AO1192                                                               | Boster biological technology                  |
| AdipoR1 #66619                                                                       | Proteintech                                   |
| AMPK #66536                                                                          | Proteintech                                   |
| UCP1 #23673                                                                          | Proteintech                                   |
| SREBP1-c #14088                                                                      | Proteintech                                   |
| GAPDH #60004                                                                         | Proteintech                                   |
| AdipoR2 #A12777                                                                      | ABclonal                                      |
| p-AMPK #AF3427                                                                       | Affinity                                      |

**Table S2. Ingredients formula of normal-chow (NC) and high-fat/high-sucrose (HFHS) diets (g/kg)**

| Diet composition   | NC    | HFHS   |
|--------------------|-------|--------|
| Casein             | 140.0 | 233.06 |
| Corn starch        | 465.7 | 84.83  |
| Dextrin            | 155.0 | 116.53 |
| Soybean oil        | 40.0  | 29.13  |
| Lard               | -     | 206.84 |
| L-cystine          | 1.8   | 3.5    |
| Sucrose            | 100.0 | 201.52 |
| Cholinebitartrate  | 2.5   | 2.33   |
| Cellulose          | 50.0  | 58.26  |
| Mineral mix AIN-93 | 35.0  | 52.44  |
| Vitamin mix AIN-93 | 10.0  | 11.56  |
| Total              | 1000  | 1000   |

**Table S3. Primer Sequences**

| Primer Name                     | Forward                     | Reverse                     |
|---------------------------------|-----------------------------|-----------------------------|
| <i>Adiponectin</i>              | 5'-TCCCAATGTACCCATTCGCT-3'  | 5'-AGTCCCAGGAATGTTGCAGTA-3' |
| <i>AdipoR1</i>                  | 5'-CGTTGGAGAGTCATCCCGTA-3'  | 5'-ACCAAGCAGATGTGTCCAGA-3'  |
| <i>AdipoR2</i>                  | 5'-CTCTCTGGTCGTGCACTTTG-3'  | 5'-GACTACAGTGGTGGTGGTGA-3'  |
| <i>AMPK<math>\alpha</math></i>  | 5'-CCGGACATAAAGTGGCTGTG-3'  | 5'-ATGATGTGAGGGTGCCTGAA-3'  |
| <i>ACC<math>\alpha</math></i>   | 5'-TATCAGTTTCCCAGCCAGCA-3'  | 5'-ATCCTACACCACAGCCTTCA-3'  |
| <i>SREBP1-c</i>                 | 5'-ACACTTCTGGAGACATCGCA-3'  | 5'-CGGATGAGGTTCCAAAGCAG-3'  |
| <i>FAS</i>                      | 5'-CACAGCAACCAGCAATACAAA-3' | 5'-TTCAGCAATTCTCGGGATGT-3'  |
| <i>PPAR<math>\alpha</math></i>  | 5'-GCATGTGAAGGCTGTAAGGG-3'  | 5'-TTGTGTGACATCCCGACAGA-3'  |
| <i>CPT-1<math>\alpha</math></i> | 5'-AGTCTGCAACTTTGTGCTG-3'   | 5'-GGTGAGTCGACTGCCAGATA-3'  |
| <i>UCP1</i>                     | 5'-AAAGTCCGCCTCAGATCCA-3'   | 5'-TGAGTCGTAGAGGCCAATCC-3'  |
| <i><math>\beta</math>-actin</i> | 5'-GGTCATCACTATTGGCAACG-3'  | 5'-TCCATACCCAAGAAGGAAGG-3'  |

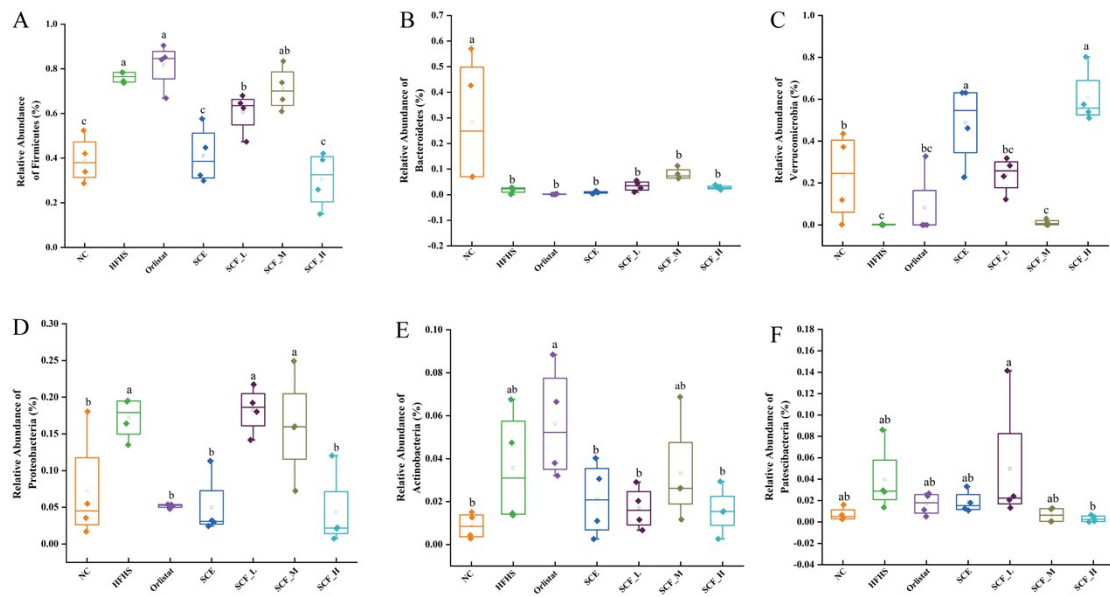

**Fig. S1** SCF modulated the composition of gut microbiota at the phylum level.

(A) *Firmicutes*. (B) *Bacteroidetes*. (C) *Verrucomicrobia*. (D) *Proteobacteria*. (E) *Actinobacteria*. (F) *Patescibacteria*. (n = 4). Significance of the differences between groups was calculated using Kruskal Wallis test with Dunn's multiple comparison test. The different letters denote that the mean values are significantly different from one another ( $p < 0.05$ ).

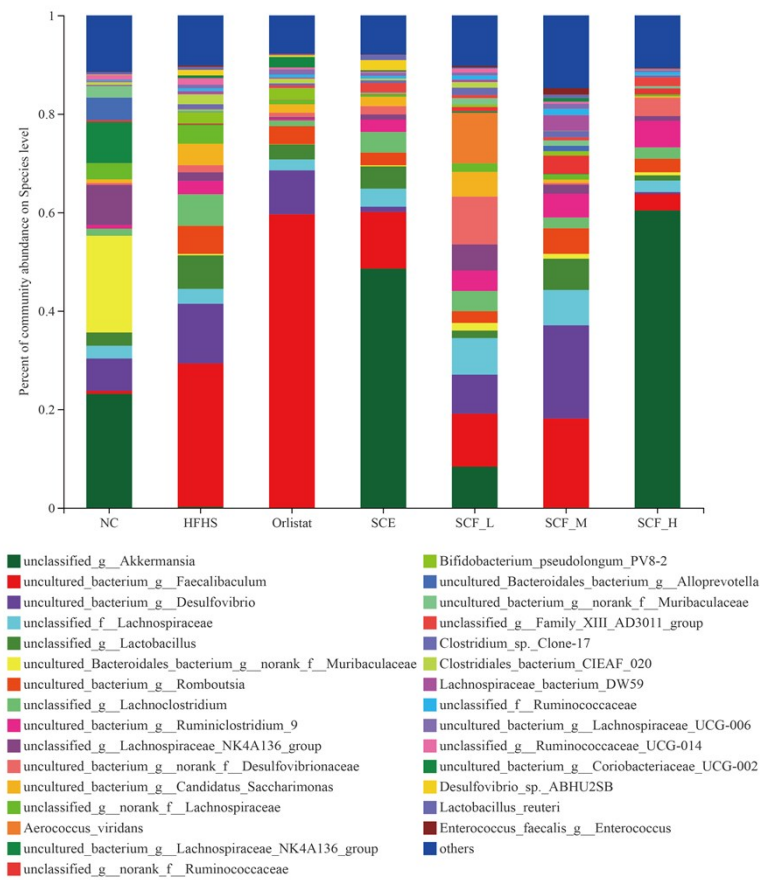

**Fig. S2** SCF modulated the gut microbiota composition at the species level.

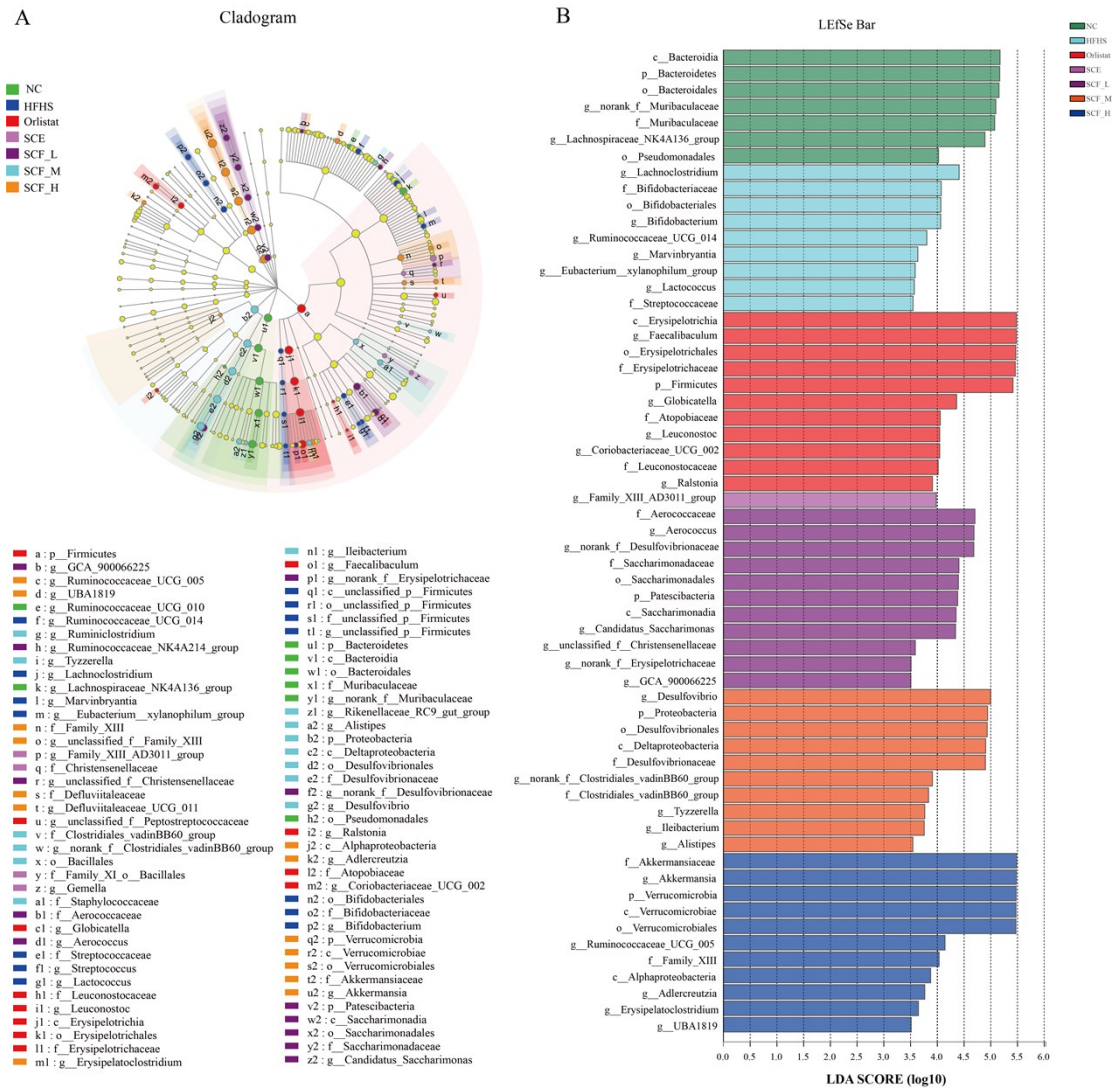

**Fig. S3** Relative abundance of key-phylotypes identified in the gut microbiota of SCF-treated mice. (A) Cladogram generated from LEfSe analysis showing the relationship between taxon. The circles from the outside to the inside indicate genus, family, order, class, phylum, and kingdom. (B) LDA score (log 10).

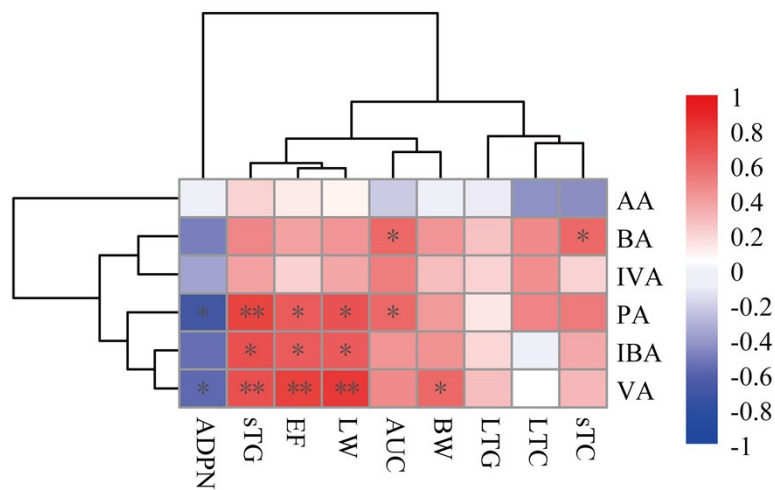

**Fig. S4** The Spearman correlation of SCFAs and obesity-associated markers. Red and blue cells indicate positive and negative correlations, respectively.

ADPN: Adiponectin; BW: Body weight; EF, weight of epididymal fat; LW, liver weight; LTG: TG content in the liver; sTG: TG content in serum; AUC: areas under the glucose-concentration-time curve; LPS: lipopolysaccharide; AA: acetic acid; BA: butyric acid; IVA: isovaleric acid; PA: propionic acid; IBA: isobutyric acid; VA: valeric acid.
